# Supplementary material for: Preparation of smectic itraconazole nanoparticles with tunable periodic order using microfluidics-based anti-solvent precipitation
Source: Royal Society of Chemistry journal article supplement (doi:10.1039/c8ce02149j), 2019-01-01
Supplement: c8ce02149j1.pdf [file c8ce02149j1.pdf]

### Electronic supplementary information

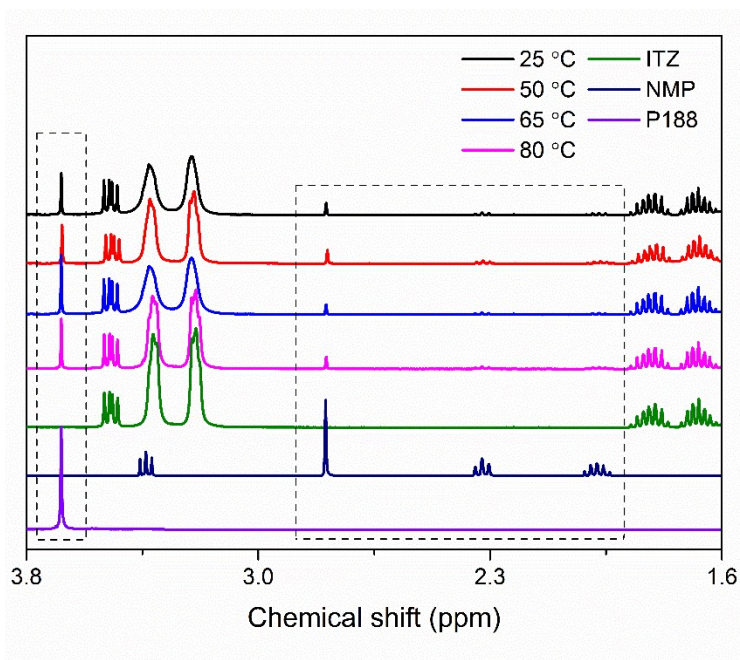

Fig.S1 NMR spectrum of ITZ precipitated at different precipitation temperatures.
